# Supplementary material
Source: ML conference proceedings conference paper supplement (https://openaccess.thecvf.com/content/CVPR2022/html/Kong_Look_Closer_To_CVPR_2022_paper.html)
Supplement: Supplementary file 1 [file Kong_Look_Closer_To_CVPR_2022_supplemental.pdf]

# Look Closer to Supervise Better: One-Shot Font Generation via Component-Based Discriminator

## Supplementary Material

### A. Implementation

#### A.1. Training details

The model is optimized using Adam with the settings of  $\beta_1=0.5$  and  $\beta_2=0.999$ . All modules are trained from scratch with a learning rate of 0.0001. We initialize the weights of convolutional and linear layers with a Gaussian distribution  $\mathcal{N}(0,0.02)$ . The batch size is set to 16 in all experiments. Our method is implemented in PyTorch and all experiments are conducted on a single NVIDIA 1080Ti GPU.

**Chinese font generation** All the images are resized to  $128 \times 128$  pixels. The learning rate is initially set to 0.0001 and linearly decreased to zero after 40 epochs.

**Handwriting generation** The images are resized to a height of 64 pixels, and the width is calculated with the original aspect ratio (up to 384 pixels). We keep the learning rate as 0.0001 for the first 15 epochs and linearly decay the rate to zero over the next 30 epochs.

**Scene text editing** For the scene text editing task, the model is trained with synthetic data and evaluated on real-world scene text image data. Specifically, we generate 1.4M synthetic data ( $I_s, I'_s$ ) with the synthesizing engine SynthTiGER [10], where  $I_s$  and  $I'_s$  have different textual content ( $T, T'$ ) respectively but other image properties such as background, font, *etc.* remain the same. In the training process, we use  $I_s$  as the style reference input and meanwhile, render the textual content  $T'$  into a content reference image, which is used as the content reference input. Since the scene text image lacks a style label, we set the style retention loss to zero and add the perceptual loss [1] and the spatially-correlative loss [12] on the basis of the original training objectives. The test set is sampled from regular and irregular scene text datasets, including IIIT5k [5], SVT [9], IC03 [4], IC13 [3], SVT-P [6], CUTE80 [7] and IC15 [2], with a total of 9,350 real-world scene text images. All the images are resized to  $64 \times 256$  pixels and the model is trained for 20 epochs with a learning rate of 0.0001.

#### A.2. Network architectures

**Generator architecture** Our generator is built upon the ResNet architecture of [11], and is further extended with our proposed changes. The original generator of [11] is an encoder-decoder architecture. In order to obtain the font generator, we adopt the original encoder architecture as our style encoder and content encoder, while using the original decoder architecture as our mixer, with a channel multiplier  $ch = 64$ . Specifically, the style encoder and the content en-

coder have the same architecture, consisting of five ResNet down-sampling blocks with a total down-sampling rate of 32. In the mixer, the encoded features are upsampled via five ResNet up-sampling blocks until the original image resolution is reached. To produce the  $3 \times H \times W$  output image, an InstanceNorm-ReLU-conv2d block with output channel 3 is additionally appended as the last layer of the mixer. We remove the self-attention layer in all ResNet blocks and add AdaIN operation as the normalization layer in every up-sampling block of the mixer.

**CAM architecture** The proposed CAM aims to supervise the generator at the component level. The detailed architecture of the CAM is shown in Table 1.

**Discriminator architecture** For the discriminator networks, we adopt a U-Net based discriminator [8]. Specifically, We adopt the U-Net discriminator architecture of the  $128 \times 128$  resolution with a channel multiplier  $ch = 16$ .

### B. Additional qualitative results

In this section, We present more qualitative results and ablation study results to better validate the effectiveness of our proposed method.

#### B.1. One-shot font generation

In Figure 1 and Figure 2, we present more generated samples in two scenarios: seen styles and unseen styles, respectively. Specifically, we randomly select 30 seen fonts and 20 unseen fonts from the two Chinese glyph test sets, and randomly sample 10 unseen target glyphs for each font to carry out the qualitative evaluation. Note that all the generated glyphs are tested in a one-shot setting, with one single style reference image provided. The results show that CG-GAN can generate high-quality glyph images in both scenarios, suggesting the superior one-shot font generation ability. Figure 3 shows that our model is able to extend to cross-lingual font generation. The model is trained on Chinese fonts but is able to generate a complete Korean font library in inference.

#### B.2. Latent space interpolations

In Figure 5, we perform a linear style interpolation between two random styles on the IAM dataset. We can observe that the generated image can smoothly change from one style to another, while strictly preserving its textual content. The results indicate that CG-GAN can generalize in the style latent space rather than memorizing some specific style patterns. Besides, we present some synthetic

Table 1. **CAM architecture**. BN denotes the batch normalization, and IN denotes the Instance normalization

|                              | Operation   | Kernel size | Resample                           | Padding | Feature maps | Normalization | Nonlinearity |
|------------------------------|-------------|-------------|------------------------------------|---------|--------------|---------------|--------------|
| Feature encoder              | Convolution | 7           | MaxPool                            | 3       | 96           | BN            | PReLU        |
|                              | Convolution | 3           | MaxPool                            | 1       | 128          | BN            | PReLU        |
|                              | Convolution | 3           | MaxPool                            | 1       | 160          | BN            | PReLU        |
|                              | Convolution | 3           | -                                  | 1       | 256          | BN            | PReLU        |
|                              | Convolution | 3           | MaxPool                            | 1       | 256          | BN            | PReLU        |
| Attention decoder            |             |             | 256 hidden units,<br>256 GRU units |         |              |               |              |
| Style classifier             | Convolution | 3           | MaxPool                            | 1       | 256          | IN            | PReLU        |
|                              | Convolution | 3           | -                                  | 1       | 512          | IN            | PReLU        |
|                              | Convolution | 3           | MaxPool                            | 1       | 512          | IN            | PReLU        |
|                              | Convolution | 3           | -                                  | 1       | n styles     | -             | -            |
| Component-wise discriminator | Convolution | 3           | MaxPool                            | 1       | 128          | IN            | PReLU        |
|                              | Convolution | 3           | MaxPool                            | 1       | 64           | IN            | PReLU        |
|                              | Convolution | 3           | -                                  | 1       | 16           | IN            | PReLU        |
|                              | Convolution | 3           | -                                  | 1       | 1            | -             | -            |

word images with various calligraphic styles in Figure 4, where each row presents diverse generated samples in the same calligraphic style.

### B.3. Scene text editing

In Figure 6, we present more scene text editing results. As we can observe, our model can robustly edit textual contents with different lengths, and achieve promising results even in challenging cases, such as complex backgrounds or slanted or curved texts.

### B.4. Additional ablation results

**Influence of the style latent vector** In this part, we trained a variant where the AdaIN operation including the style latent vector  $f_s$  is removed. Results are shown in Table 2. It is noted that there is only a slight drop in performance, indicating that the style latent vector  $f_s$  is not that necessary. Such results partly reflect our primary purpose, that is, the performance improvement is mainly gained by providing more effective supervision for the generator, not by struggling to increase the complexity of the generator.

**Influence of the U-net Discriminator** We further investigate the influence of the U-net architecture of the discriminator. Specifically, we trained a variant where the U-net architecture of the discriminator is removed, only the encoder part  $D_{enc}$  is preserved. For font generation and handwriting generation tasks, we set the channel multiplier  $ch$  of the discriminator to 16 and 64, respectively. As shown in Table 3, the performance of the variant is comparable to our current approach on the font generation task, which still outperforms all the other baselines in all metrics. And the variant is also competitive on handwriting generation task, as shown in Table 4. The results indicate that decoder part  $D_{dec}$  has no significant effect on the performance. This may be due to the simple background of the dataset, which

contains a lot of pixels with values (255,255,255), thus the pixel-level discrimination performed by  $D_{dec}$  may not be so effective.

Table 2. The impact of the style latent vector on the Chinese font generation task.

| Method           | SSIM↑         | RMSE↓         | LPIPS↓        | FID↓         |
|------------------|---------------|---------------|---------------|--------------|
| CG-GAN (ours)    | <b>0.7568</b> | <b>0.0218</b> | <b>0.2058</b> | <b>17.94</b> |
| w/o style latent | 0.7549        | 0.0225        | 0.2193        | 18.73        |

Table 3. The impact of the U-net architecture of the discriminator on the Chinese font generation task.

| Method                            | SSIM↑         | RMSE↓         | LPIPS↓        | FID↓         |
|-----------------------------------|---------------|---------------|---------------|--------------|
| Seen styles and Unseen contents   |               |               |               |              |
| CG-GAN (ours)                     | 0.7703        | 0.0212        | 0.1919        | <b>6.54</b>  |
| w/o $D_{dec}$                     | <b>0.7795</b> | <b>0.0207</b> | <b>0.1821</b> | 7.14         |
| Unseen styles and Unseen contents |               |               |               |              |
| CG-GAN (ours)                     | 0.7568        | 0.0218        | 0.2058        | <b>17.94</b> |
| w/o $D_{dec}$                     | <b>0.7603</b> | <b>0.0214</b> | <b>0.1967</b> | 19.07        |

Table 4. The impact of the U-net architecture of the discriminator on the writer-relevant handwriting generation task.

|               | IV-S          | IV-U          | OOV-S         | OOV-U         |
|---------------|---------------|---------------|---------------|---------------|
| CG-GAN (ours) | 102.18        | <b>110.07</b> | 104.81        | 113.01        |
| w/o $D_{dec}$ | <b>101.48</b> | 111.29        | <b>102.67</b> | <b>112.77</b> |

Figure 1. Seen styles and unseen contents in Chinese one-shot font generation.



|                 |                |                 |                  |                 |                 |                  |                  |                 |                 |
|-----------------|----------------|-----------------|------------------|-----------------|-----------------|------------------|------------------|-----------------|-----------------|
| 猗鼎内蹊筵咂媼鄣鰐隼劓腩膝漕  | 别盱洮欽赤狻噤掌鱼彡庠档碇裼 | 辞侏邁氣慨酖硌歲厄戕舴鯉匚窖华 | 数笈稹鮫阴竦毗苙躄髻噪块籀茆卍净 | 祛呕复踯眅蛺尔踟髻皑呶众腆圪礲 | 僭兼褊蕝吡沔窳从口羝黥瘞亏最独 | 鬢腑浞帑淌盟丽从𨾿牷薰鳧逯舸   | 竿伢鞬佣朒徐盐愜糎脏薰鱃逯舸   | 滢菽醢湿旧琬据蜢尧竦癖颯稹檣血 | 黎忻会症棒恋鯖郛疥栏啁椽梧埒覘 |
| 痃肱进体嶗暖枳莞部岗胛剜库嗽汉 | 虬溺郭翹醺弁弋恁馘习脰怜穀庖 | 侠蒙寿卢漂璨匱如鯨槿叹荔崞腺保 | 掙隰湍圻祐夔映卩杀鲁桺擗榭臬療  | 雄櫓稳邨筛髀微螢傘甃酖岬岬岬岬 | 趺萘联附楸筐玃著癰嗔莖踊之艷表 | 薤佻浊蹇拏忾匡医倬癯珞觥擢猫析畚 | 涵冂餽蟪橢忝埽梯襦莆妍姦箴菖小鐸 | 瓠禅乔螳榛柶漆哇噫际粳沙砒喀按 | 泥羌巧吠麓髀晁昭揎怙岁礎仞昵侨 |

Figure 2. Unseen styles and unseen contents in Chinese ont-shot font generation.

富醪峒 如竺霭蜂吟 螽羸猷 荊欧稠  
 葱畦停 内歙畔 簞倚襍 肱覬备 苜罌耨  
 蚋恂嫩 淖滹漈 德稔莠 疔艾睥 蜎鯨涿  
 莛瘵恠 狻笋犰 飡飧疣 痼瘕登 吁烷弥  
 槩涓任 菟藁穢 淫岬藁 糝拥扃 氏瞳莅  
 獮擲呶 媼楯懂 标芡螺 欹桥隹 低旧畦  
 开蝮礞 匡接愆 伎胼奄 嫫歆桥 隹隹画  
 濯倅被 嘈咳胶 悾柘 薰粳 躐穰 霾研 魇

Figure 3. Cross lingual font generation.

| Style Reference | Generated Text                                                                |
|-----------------|-------------------------------------------------------------------------------|
| pity            | they Very palm began always People firmly losing position surprised analogous |
| blonde          | all see ask wish need other would which there become Remember                 |
| has             | the off that like What well which health however medicine character           |
| out             | but the that with well shown found People however remedies wondered           |
| then            | the with will well word then that know could finally happiness                |
| with            | the wife them that need child author cinema someone elements ambition         |
| has             | the that then with when there happens doctor number resource wondered         |

Figure 4. Visual comparison for synthesizing handwritten words.

|           | Style <sub>1</sub>                                                                              | Style <sub>2</sub> |
|-----------|-------------------------------------------------------------------------------------------------|--------------------|
| Real      | has                                                                                             | has                |
| Generated | has                                                     | has                |
| Real      | took                                                                                            | took               |
| Generated | took                                          | took               |
| Real      | with                                                                                            | with               |
| Generated | with                                          | with               |
| Real      | could                                                                                           | could              |
| Generated | could                               | could              |
| Real      | because                                                                                         | because            |
| Generated | because         | because            |
| Real      | through                                                                                         | through            |
| Generated | through         | through            |
| Real      | Commons                                                                                         | Commons            |
| Generated | Commons | Commons            |

Figure 5. Style interpolation between two different styles.

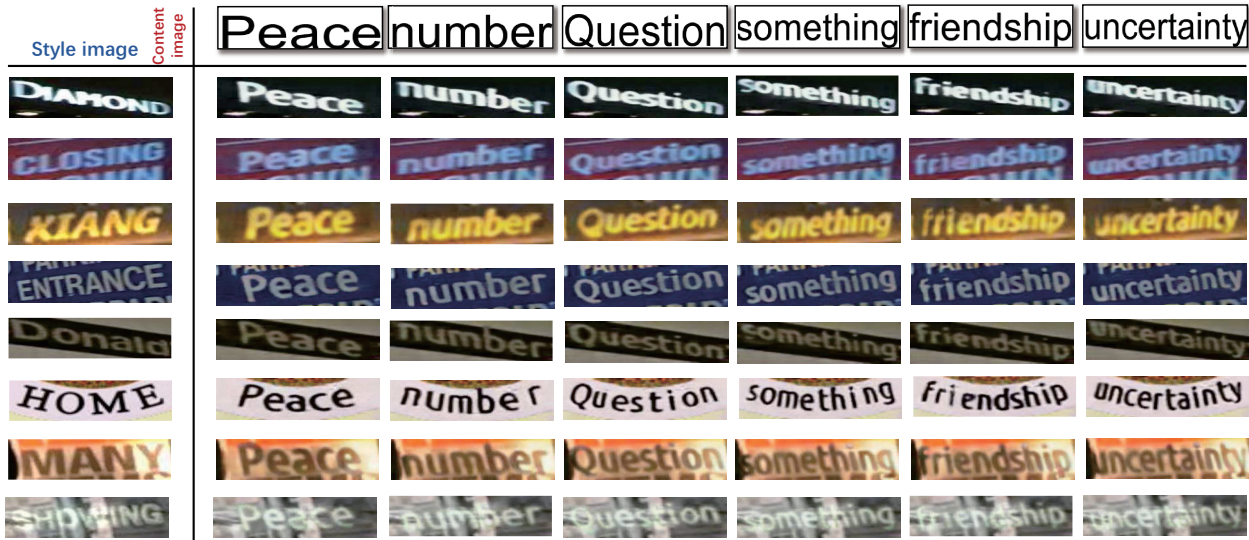

Figure 6. Additional scene text editing results.

## References

- [1] Justin Johnson, Alexandre Alahi, and Li Fei-Fei. Perceptual losses for real-time style transfer and super-resolution. In *ECCV*, pages 694–711, 2016. [1](#)
- [2] Dimosthenis Karatzas, Lluís Gomez-Bigorda, Angelos Nicolaou, Suman Ghosh, Andrew Bagdanov, Masakazu Iwamura, Jiri Matas, Lukas Neumann, Vijay Ramaseshan Chandrasekhar, Shijian Lu, et al. ICDAR 2015 competition on robust reading. In *ICDAR*, pages 1156–1160, 2015. [1](#)
- [3] Dimosthenis Karatzas, Faisal Shafait, Seiichi Uchida, Masakazu Iwamura, Lluís Gomez i Bigorda, Sergi Robles Mestre, Joan Mas, David Fernandez Mota, Jon Almazan Almazan, and Lluís Pere De Las Heras. Icdar 2013 robust reading competition. In *ICDAR*, pages 1484–1493, 2013. [1](#)
- [4] Simon M Lucas, Alex Panaretos, Luis Sosa, Anthony Tang, Shirley Wong, Robert Young, Kazuki Ashida, Hiroki Nagai, Masayuki Okamoto, Hiroaki Yamamoto, et al. ICDAR 2003 robust reading competitions: entries, results, and future directions. In *ICDAR*, pages 105–122, 2003. [1](#)
- [5] Anand Mishra, Karteek Alahari, and CV Jawahar. Scene text recognition using higher order language priors. In *BMVC*, 2012. [1](#)
- [6] Trung Quy Phan, Palaiahnakote Shivakumara, Shangxuan Tian, and Chew Lim Tan. Recognizing text with perspective distortion in natural scenes. In *ICCV*, pages 569–576, 2013. [1](#)
- [7] Anhar Risnumawan, Palaiahankote Shivakumara, Chee Seng Chan, and Chew Lim Tan. A robust arbitrary text detection system for natural scene images. *Expert Systems with Applications*, pages 8027–8048, 2014. [1](#)
- [8] Edgar Schonfeld, Bernt Schiele, and Anna Khoreva. A U-Net Based Discriminator for Generative Adversarial Networks. In *CVPR*, pages 8207–8216, 2020. [1](#)
- [9] Kai Wang, Boris Babenko, and Serge Belongie. End-to-end scene text recognition. In *ICCV*, pages 1457–1464, 2011. [1](#)
- [10] Moonbin Yim, Yoonsik Kim, Han-Cheol Cho, and Sungrae Park. SynthTIGER: Synthetic Text Image GENERator Towards Better Text Recognition Models. In *ICDAR*, pages 109–124, 2021. [1](#)
- [11] Han Zhang, Ian Goodfellow, Dimitris Metaxas, and Augustus Odena. Self-Attention Generative Adversarial Networks. In *ICML*, pages 7354–7363, 2019. [1](#)
- [12] Chuanxia Zheng, Tat-Jen Cham, and Jianfei Cai. The spatially-correlative loss for various image translation tasks. In *CVPR*, pages 16407–16417, 2021. [1](#)
